# Supplementary material
Source: Springer Nature journal article supplement (https://www.springermedizin.de/resource/supplementary/12885_2012_3785_MOESM1_ESM.pdf/9464422)

A. Physical activity (e.g. 30 minutes brisk walking);  
n = 338

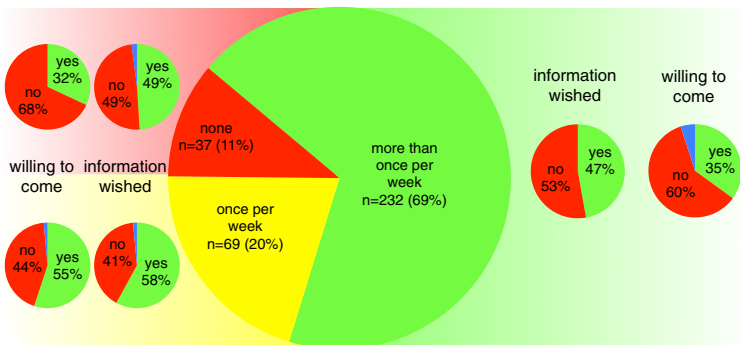

B. Attention to eating habits; n = 342

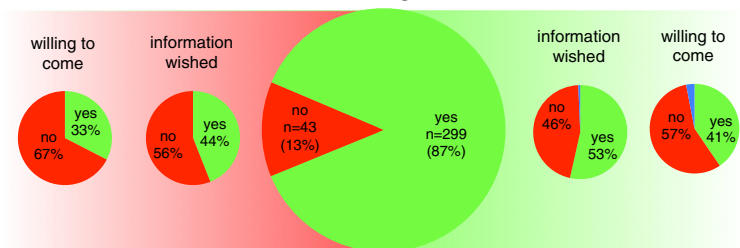

C. Use of CAM; n = 334

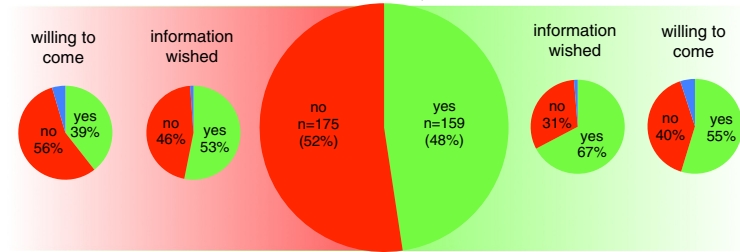

Supplement: MOESM1 [file 9464422]
